# Supplementary material for: Caesium ion sequestration by a fluoro-metallocrown [16]-MC-8
Source: Royal Society of Chemistry journal article supplement (doi:10.1039/c0cc01188f), 2010-01-01

## Cesium ion sequestration by a fluoro-metallocrown [16]-MC-8

### Supporting Information

Figure S1.  $^1\text{H}$ -NMR spectrum of **1**  $[(\text{H}_3\text{N}^{\text{Pr}})\text{Cr}_7\text{CoF}_8(\text{tBuCO}_2)_{16}]$  at 300MHz in  $\text{CDCl}_3$  (Pivalate region)

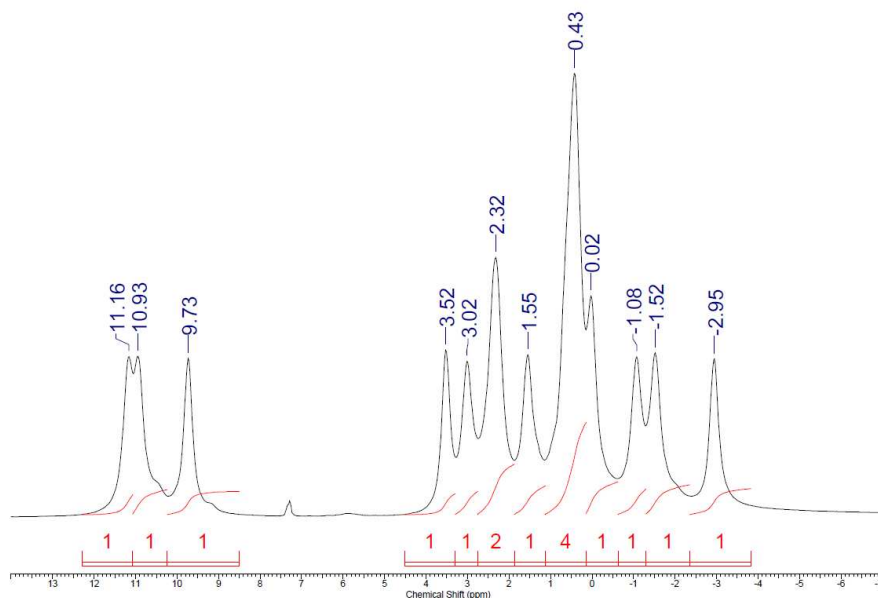

Figure S2.  $^1\text{H}$ -NMR spectrum of **2**  $[\text{Cs} \subset \text{Cr}_7\text{MF}_8(\text{tBuCO}_2)_{16}]$  at 300MHz in  $\text{CDCl}_3$  (Pivalate region)

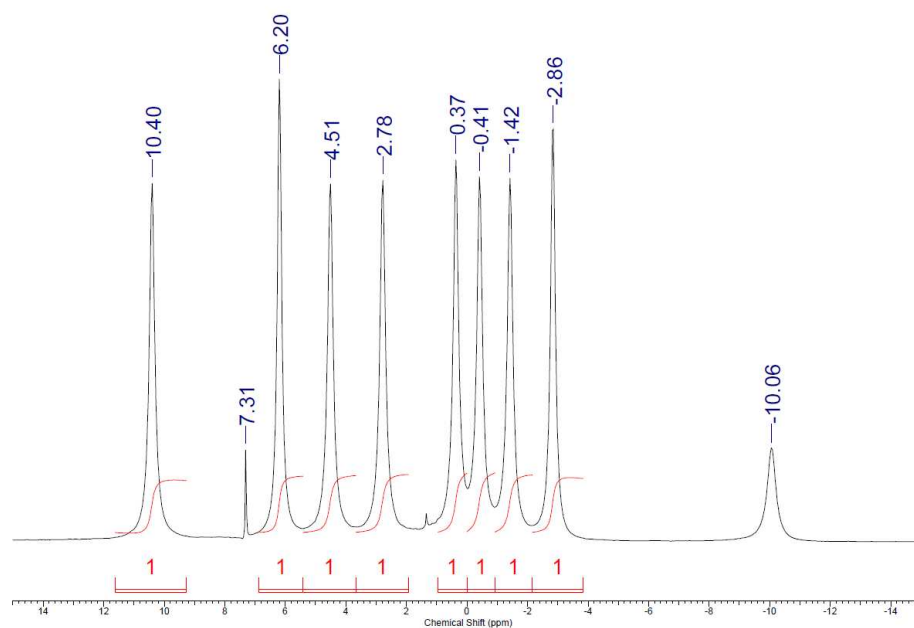

Supplement: c0cc01188f.pdf [file c0cc01188f.pdf]
